# Supplementary material
Source: publisher figshare collection journal article supplement (https://rs.figshare.com/ndownloader/files/14652731)
Supplement: Supplementary file 1 [file 14652731]

# SUPPLEMENTARY MATERIAL

## Metabolic basis of brain-like electrical signalling in bacterial communities

Rosa Martinez-Corral<sup>1</sup>, Jintao Liu<sup>2,\*</sup>, Arthur Prindle<sup>3,\*</sup>, Gürol M. Süel<sup>4</sup>, and Jordi Garcia-Ojalvo<sup>1</sup>

<sup>1</sup>*Department of Experimental and Health Sciences, Universitat Pompeu Fabra, Barcelona Biomedical Research Park, 08003 Barcelona, Spain*

<sup>2</sup>*Center for Infectious Diseases Research and Tsinghua-Peking Center for Life Sciences, School of Medicine, Tsinghua University, 100084 Beijing, China*

<sup>3</sup>*Department of Biochemistry and Molecular Genetics, Feinberg School of Medicine, Northwestern University, Chicago, IL 60611, USA; Center for Synthetic Biology, Northwestern University, Evanston, IL 60208, USA.*

<sup>4</sup>*Division of Biological Sciences, San Diego Center for Systems Biology, and Center for Microbiome Innovation, University of California San Diego, California 92093, USA*

\*Equal contribution

## 1 Model equations and description

As explained in the main text, we consider a one-dimensional array of simulation lattice sites where biochemical species react and diffuse. Here we describe in detail the model equations.

### 1.1 Metabolic component

In the 'non-biofilm' sites, we consider media flow and diffusion of glutamate ( $G$ ) and ammonium ( $A$ ) according to the following equations:

$$\frac{dG_e}{dt} = \phi (G_m - G_e) + D_g \nabla^2 G_e \quad (\text{S1})$$

$$\frac{dA}{dt} = \phi (A_m - A) + D_a \nabla^2 A \quad (\text{S2})$$

In the microfluidics chamber, media is flowing constantly. Thus, we simulate the effect of the media flow with the first term of each equation, such that with some rate  $\phi$ , the concentration

of the chemical species tends to equate that in the medium ( $X_m$ ). The second term models diffusion.

In the biofilm, we assume that the diffusion coefficient and flow rate of glutamate decay exponentially with the distance to the biofilm edge  $d_e$ , due to the extracellular matrix and high cell density, according to the following functions:

$$\Lambda_\phi = \frac{\exp(-\gamma_\phi d_e) + a_\phi}{1 + a_\phi} \quad (\text{S3})$$

$$\Lambda_D = \frac{\exp(-\gamma_D d_e) + a_D}{1 + a_D} \quad (\text{S4})$$

These functional forms are chosen such that at the edge  $\Lambda_x = 1$ , and flow and diffusion match those in the media. The coefficients decay towards the biofilm interior, tending asymptotically to  $a/(1 + a)$  in the centre, which ensures some remaining flow and diffusion. We follow the original assumption [1] that ammonium diffusion over the biofilm is very fast, and do not apply these reduction terms to this variable.

The dynamics of extracellular ( $G_e$ ) and intracellular ( $G_i$ ) glutamate in the biofilm are modelled with the following dynamical equations:

$$\frac{dG_e}{dt} = -\alpha_g \mathcal{F}(V) R_g \frac{G_e}{k_g + G_e} + \Lambda_\phi \phi (G_m - G_e) + \Lambda_D D_g \nabla^2 G_e \quad (\text{S5})$$

$$\frac{dG_i}{dt} = \alpha_g \mathcal{F}(V) R_g \frac{G_e}{k_g + G_e} - \alpha_a H G_i - \delta_g G_i r, \quad (\text{S6})$$

where, as mentioned,  $G_e$  is affected by media flow and diffusion. The first term in the right-hand side of the two equations represents glutamate transport into the cells. As explained in the main text, we consider that glutamate transport into the cell is modulated by the membrane potential  $V$ , such that depolarisation reduces entry, and hyperpolarisation enhances it, according to the functional form given in Eq. (2) of the main text.

In addition, we assume that glutamate is imported into the cells through the glutamate transporter  $R_g$ , which saturates for large enough  $G_e$ , with half-maximum concentration  $k_g$ . We describe explicitly the dynamics of  $R_g$  by:

$$\frac{dR_g}{dt} = \alpha_R - \delta_R R_g + \beta_R \frac{r^{n_R}}{k_R^{n_R} + r^{n_R}}. \quad (\text{S7})$$

We thus assume that  $R_g$  is produced at a basal rate  $\alpha_R$  and degraded at a rate  $\delta_R$ . The last term accounts for the higher glutamate uptake by metabolically active cells, such that the presence of biomass-producing biomolecules, such as ribosomal proteins, denoted by  $r$ , enhances  $R_g$  synthesis via a Hill function with exponent  $n_R$ .

Equation (S6) also assumes that intracellular glutamate concentration decays due to ammonium production via the GDH enzyme (represented by  $H$  in the  $\alpha_a$ -term at the right-hand side of

the equation) and through various metabolic tasks including in particular biomass production ( $\delta_g$ -term).

The production of ammonium is regulated by the activity of the enzyme GDH. We describe the dynamics of the inactive and active forms of this enzyme,  $h$  and  $H$  respectively, by the equations:

$$\frac{dh}{dt} = \frac{\alpha_h}{1 + (G_i/k_h)^{n_h}} - \alpha_H h \frac{G_i^{n_H}}{k_H^{n_H} + G_i^{n_H}} - \gamma_h h + \gamma_H H \quad (\text{S8})$$

$$\frac{dH}{dt} = \alpha_H h \frac{G_i^{n_H}}{k_H^{n_H} + G_i^{n_H}} - \gamma_H H \quad (\text{S9})$$

such that we account for synthesis and degradation of inactive GDH and its conversion into the active form ( $\alpha_H$ -term in the two equations). As explained in the main text, we assume that high concentrations of glutamate inhibit GDH synthesis, whereas activation is positively regulated by glutamate via a Hill function with exponent  $n_H$ . We also consider deactivation at a constant rate  $\gamma_H$ .

Ammonium dynamics is affected by production from glutamate by active GDH, consumption for various metabolic processes such as biomass production, and diffusion:

$$\frac{dA}{dt} = \alpha_a H G_i - \delta_a A r + D_a \nabla^2 A \quad (\text{S10})$$

Finally, biomass production is considered to increase with ammonium and intracellular glutamate, and to be subject to linear decay:

$$\frac{dr}{dt} = \beta_r A G_i - \gamma_r r \quad (\text{S11})$$

## 1.2 Electrical signalling

Next we incorporate an adapted version of the electrical model introduced in [2]. As explained in the main text, we consider an inhibitory effect of intracellular glutamate on a stress variable  $S$ , whose production rate is modelled with an inhibitory Hill function:

$$\frac{dS}{dt} = \frac{S_0}{1 + \left(\frac{G_i}{G_{s0}}\right)^{n_s}} - \gamma_s S \quad (\text{S12})$$

We explicitly consider both extracellular ( $K_e$ ) and intracellular ( $K_i$ ) potassium, whose dynamics are given by:

$$\frac{dK_e}{dt} = F g_K n_k^4 (V - V_K) - D_p G_i K_e (K_{i0} - K_i) + \Lambda_\phi \phi (K_m - K_e) + \Lambda_D D_k \nabla^2 K_e \quad (\text{S13})$$

$$\frac{dK_i}{dt} = -F g_K n_k^4 (V - V_K) + D_p G_i K_e (K_{i0} - K_i) \quad (\text{S14})$$

Potassium uptake is assumed to be governed by homeostatic processes that tend to keep its intracellular concentration at a fixed value  $K_{i0}$ , described by the second term in the right-hand side of Eqs. (S13)-(S14). Uptake is also made to depend on the metabolic state (glutamate level), to account for the energy demand of the process. In addition, extracellular potassium diffuses and is subject to the media flow in the chamber.

Potassium flow through its ion channel (first term in the right-hand side of the  $K_e$  and  $K_i$  equations) is governed by the corresponding Nernst potential:

$$V_K = V_{K0} \ln\left(\frac{K_e}{K_i}\right), \quad (\text{S15})$$

and depends on the opening probability of the potassium channel,  $n_k$ :

$$\frac{dn_k}{dt} = \frac{a_0 S}{S_{th} + S} (1 - n_k) - b n_k \quad (\text{S16})$$

In the media lattice sites, as in the case of glutamate and ammonium [Eqs. (S1) and (S2)], the extracellular potassium dynamics is affected by diffusion and by the media flow:

$$\frac{dK_e}{dt} = \phi (K_m - K_e) + D_k \nabla^2 K_e \quad (\text{S17})$$

The membrane potential dynamics is described by a Hodgkin-Huxley-like conductance-based model containing potassium flux through the ion channel and a leak current [2]:

$$\frac{dV}{dt} = -g_K n_k^4 (V - V_K) - g_L (V - V_L), \quad (\text{S18})$$

where the leak potential  $V_L$  is assumed to depend on the extracellular potassium [2] in a threshold-linear manner, such that when  $K_e$  is larger than its basal level in the medium,  $K_m$ , the leak potential  $V_L$  grows linearly (and the cell depolarizes), while when  $K_e < K_m$  the leak potential stays at its basal level:

$$V_L = V_{L0} + d_L \frac{K_e - K_m}{1 - e^{-(K_e - K_m)/\sigma}} \quad (\text{S19})$$

Finally, we include the ThT reporter  $\mathcal{T}$  downstream of the membrane potential, increasing when the cells become hyperpolarised due to potassium release:

$$\frac{d\mathcal{T}}{dt} = \frac{\alpha_{\mathcal{T}}}{1 + \exp(g_{\mathcal{T}}(V - V_{0\mathcal{T}}))} - \gamma_{\mathcal{T}} \mathcal{T} \quad (\text{S20})$$

### 1.3 Simplified model

In the simplified model, we keep the same dynamics for the electrical part (Eqs. (S12)-(S20)). The metabolic part is simplified as follows: Eqs. (S8)-(S11) are removed, the equations for extracellular glutamate dynamics, in both ‘biofilm’ and ‘non-biofilm’ sites (Eqs. S1, S5), are maintained, and Eqs. (S6) and (S7) become:

$$\frac{dG_i}{dt} = \alpha_g \mathcal{F}(V) R_g \frac{G_e}{k_g + G_e} - \delta_g G_i \quad (\text{S21})$$

$$\frac{dR_g}{dt} = \alpha_R - \delta_R R_g + \alpha_r \frac{G_i^{n_r}}{k_r^{n_r} + G_i^{n_r}} \quad (\text{S22})$$

## 2 Supplementary tables and figures

| Parameter  | Description                                                           | Full model | Simplified model | Units                           |
|------------|-----------------------------------------------------------------------|------------|------------------|---------------------------------|
| $\alpha_g$ | glutamate uptake constant                                             | 36.0       | 24.0             | mM / ( $\mu\text{M h}$ )        |
| $k_g$      | extracellular glutamate concentration at half-maximal uptake rate     | 0.75       | 0.75             | mM                              |
| $G_m$      | glutamate concentration in the media                                  | 30.0       | 30.0             | mM                              |
| $D_g$      | glutamate diffusion coefficient                                       | 4e+06      | 4e+06            | $\mu\text{m}^2/\text{h}$        |
| $\alpha_a$ | ammonium production constant                                          | 4.5        | -                | $\mu\text{M}^{-1}\text{h}^{-1}$ |
| $\delta_g$ | glutamate degradation constant                                        | 0.525      | 4.8              | $\text{mM}^{-1}\text{h}^{-1}$   |
| $\alpha_R$ | glutamate receptor synthesis rate                                     | 6.75       | 4.5              | $\mu\text{M}/\text{h}$          |
| $\delta_R$ | glutamate receptor decay constant                                     | 36.0       | 24.0             | $\text{h}^{-1}$                 |
| $\beta_R$  | maximum rate of glutamate receptor induction                          | 45.0       | 31.0             | $\mu\text{M}/\text{h}$          |
| $k_R$      | threshold for $R_g$ induction                                         | 5.0        | 2.25             | mM                              |
| $n_R$      | Hill coefficient for $R_g$ induction                                  | 2.0        | 2.0              | -                               |
| $\alpha_h$ | maximal GDH synthesis rate                                            | 0.075      | -                | $\mu\text{M}/\text{h}$          |
| $k_h$      | threshold for inhibition of GDH synthesis by glutamate                | 1.5        | -                | mM                              |
| $\gamma_h$ | GDH decay rate                                                        | 0.01       | -                | $\text{h}^{-1}$                 |
| $n_h$      | Hill coefficient for GDH synthesis inhibition by glutamate            | 2.0        | -                | -                               |
| $\alpha_H$ | GDH activation constant                                               | 3.0        | -                | $\text{h}^{-1}$                 |
| $k_H$      | intracellular glutamate concentration for half-maximal GDH activation | 0.4        | -                | mM                              |
| $n_H$      | Hill coefficient for GDH activation by glutamate                      | 2.0        | -                | -                               |
| $\gamma_H$ | GDH deactivation constant                                             | 5.0        | -                | $\text{h}^{-1}$                 |
| $\delta_a$ | ammonium consumption constant                                         | 0.135      | -                | $\text{mM}^{-1}\text{h}^{-1}$   |
| $A_m$      | ammonium concentration in the media                                   | 0.0        | -                | mM                              |
| $D_a$      | ammonium diffusion coefficient                                        | 7e+06      | -                | $\mu\text{m}^2/\text{h}$        |
| $\beta_r$  | biomass-producing biomolecules synthesis rate                         | 15.0       | -                | $\text{mM}^{-1}\text{h}^{-1}$   |
| $\gamma_r$ | biomass-producing biomolecules decay rate                             | 6.0        | -                | $\text{h}^{-1}$                 |
| $S_0$      | maximum stress production rate                                        | 1.12       | 1.12             | $\mu\text{M}/\text{h}$          |
| $G_{S0}$   | threshold for stress inhibition by glutamate                          | 0.2        | 0.2              | mM                              |
| $n_s$      | Hill coefficient for stress inhibition by glutamate                   | 2.0        | 2.0              | -                               |
| $\gamma_s$ | stress decay constant                                                 | 2.8        | 2.8              | $\text{h}^{-1}$                 |
| $a_0$      | maximum rate of increase of the potassium channel gating probability  | 91.0       | 91.0             | $\text{h}^{-1}$                 |
| $S_{th}$   | stress level for half-maximal gating activity                         | 0.03       | 0.03             | $\mu\text{M}$                   |
| $b$        | opening probability decay constant                                    | 21.25      | 34.0             | $\text{h}^{-1}$                 |

Table S1 – *Continued on next page*

Table S1 – *Continued from previous page*

| Parameter     | Description                                                        | Full model | Simplified model | Units                         |
|---------------|--------------------------------------------------------------------|------------|------------------|-------------------------------|
| $F$           | membrane capacitance                                               | 0.05       | 0.05             | mM/mV                         |
| $g_K$         | potassium channel conductance                                      | 70.0       | 70.0             | $\text{h}^{-1}$               |
| $V_{K0}$      | Nernst potential prefactor                                         | 100.0      | 100.0            | mV                            |
| $D_p$         | potassium uptake constant                                          | 0.12       | 0.12             | $\text{mM}^{-2}\text{h}^{-1}$ |
| $K_{i0}$      | intracellular potassium concentration                              | 300.0      | -                | mM                            |
| $D_k$         | potassium diffusion coefficient                                    | 7e+06      | 7e+06            | $\mu\text{m}^2/\text{h}$      |
| $K_m$         | potassium concentration in the media                               | 8.0        | 8.0              | mM                            |
| $g_L$         | leak conductance                                                   | 18.0       | 18.0             | $\text{h}^{-1}$               |
| $d_L$         | leak slope coefficient                                             | 4.0        | 4.0              | mV/mM                         |
| $V_{L0}$      | basal leak potential                                               | -156.0     | -156.0           | mV                            |
| $\sigma$      | leak threshold sharpness coefficient                               | 0.1        | 0.1              | mM                            |
| $g_v$         | inverse sensitivity of glutamate uptake to membrane potential      | 1.0        | 1.0              | $\text{mV}^{-1}$              |
| $V_0$         | resting membrane potential                                         | -150.0     | -150.0           | mV                            |
| $\alpha\tau$  | maximal rate of ThT uptake                                         | 20.0       | 20.0             | $\mu\text{M}/\text{h}$        |
| $\gamma\tau$  | intracellular ThT decay constant                                   | 10.0       | 10.0             | $\text{h}^{-1}$               |
| $g\tau$       | inverse sensitivity of ThT to membrane potential                   | 0.3        | 0.3              | $\text{mV}^{-1}$              |
| $P_{grow}$    | growth probability                                                 | 0.3        | 0.5              | $\text{h}^{-1}$               |
| $\gamma_\phi$ | spatial decay rate of the flow rate within the biofilm             | 0.0085     | 0.0085           | $\mu\text{m}$                 |
| $a_\phi$      | basal flow factor                                                  | 0.012      | 0.012            | -                             |
| $\gamma_D$    | spatial decay rate of the diffusion coefficient within the biofilm | 0.0085     | 0.0085           | $\mu\text{m}$                 |
| $a_D$         | basal diffusion factor                                             | 0.012      | -                |                               |
| $\phi$        | flow rate                                                          | 5.0        | 5.0              | $\text{h}^{-1}$               |

Table S1: Parameter description and basal values for the two models.

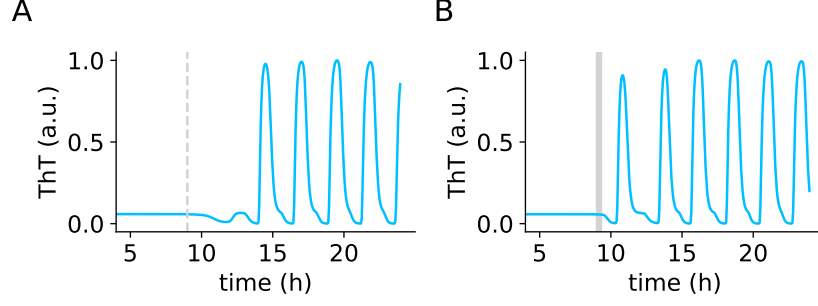

Figure S1: Stop-flow triggers oscillations in the simplified model. Normalised ThT time traces at the periphery ( $50 \mu\text{m}$  from the biofilm edge). A) Reference simulation. Vertical dashed line indicates the time of stop-flow in B. (This simulation is the same as in Fig. 5B). B) The biofilm was perturbed with a stop-flow-like perturbation ( $\phi = 0$  during 20 min at  $t = 9$  hours). The growth noise realisation is the same in both simulations, such that the only difference is the perturbation.

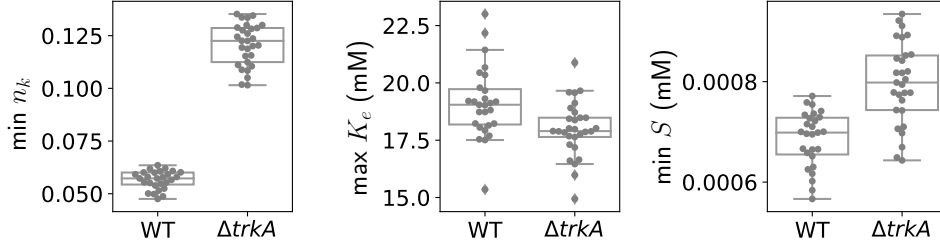

Figure S2: The  $\Delta trkA$  mutation in the model leads to impaired stress relief. For each simulation, either the maximum or the minimum of the variable during the oscillations was computed for the peripheral region (outermost  $100 \mu\text{m}$ ). Each dot represents a simulation, from the same data as in Fig. 6 from the main text.

## References

- [1] J. Liu, A. Prindle, J. Humphries, M. Gabalda-Sagarra, M. Asally, D.-y. D. Lee, S. Ly, J. Garcia-Ojalvo, and G. M. Süel, “Metabolic co-dependence gives rise to collective oscillations within biofilms,” *Nature*, vol. 523, no. 7562, pp. 550–554, 2015.
- [2] A. Prindle, J. Liu, M. Asally, S. Ly, J. Garcia-Ojalvo, and G. M. Süel, “Ion channels enable electrical communication in bacterial communities,” *Nature*, vol. 527, no. 7576, pp. 59–63, 2015.
